# Supplementary material for: Facile functionalization of FK506 for biological studies by the thiol–ene ‘click’ reaction
Source: Royal Society of Chemistry journal article supplement (doi:10.1039/c3ra47867j), 2014-01-01
Supplement: c3ra47867j.pdf [file c3ra47867j.pdf]

## Supporting information

### Facile Functionalization of FK506 for Biological Studies by the Thiol-Ene ‘Click’ Reaction

Zhi-Fo Guo, Roushu Zhang and Fu-Sen Liang

#### Table of content

| Contents                                          | Page  |
|---------------------------------------------------|-------|
| Supplementary Figure 1                            | 2     |
| Supplementary Figure 2                            | 3     |
| Experiment section                                |       |
| Chemicals and instrument                          | 4     |
| Synthesis of compounds                            | 4-7   |
| Plasmid construction                              | 7     |
| Cell Culture and transfection                     | 7     |
| Luciferase assay                                  | 7-8   |
| Compound Characterization                         |       |
| NMR of compound <b>17</b>                         | 9     |
| NMR of compound <b>18</b>                         | 10    |
| NMR and HRMS of compound <b>19</b>                | 11-12 |
| NMR and HRMS of compound <b>20</b>                | 12-13 |
| NMR and HRMS of compound <b>21</b>                | 14-15 |
| NMR and HRMS of compound <b>9</b>                 | 15-16 |
| <sup>1</sup> H NMR and HRMS of compound <b>3</b>  | 17    |
| <sup>1</sup> H NMR and HRMS of compound <b>4</b>  | 18    |
| <sup>1</sup> H NMR and HRMS of compound <b>6</b>  | 19    |
| <sup>1</sup> H NMR and HRMS of compound <b>11</b> | 20    |
| <sup>1</sup> H NMR and HRMS of compound <b>12</b> | 21    |
| <sup>1</sup> H NMR and HRMS of compound <b>13</b> | 22    |
| <sup>1</sup> H NMR and HRMS of compound <b>15</b> | 23    |

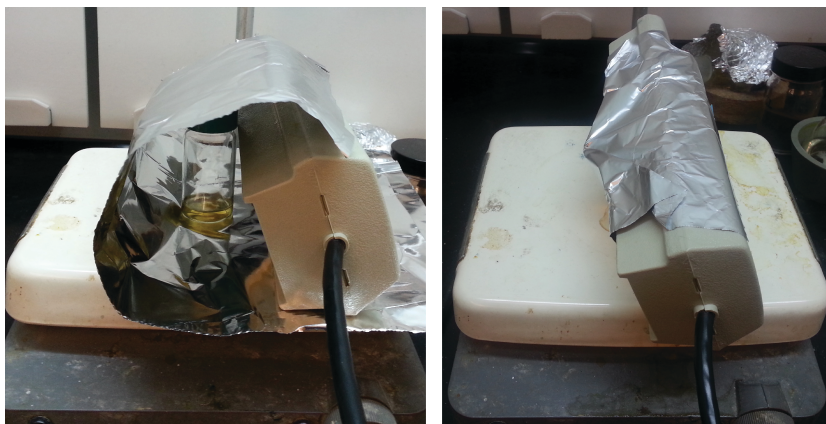

**Fig. S1.** TEC reaction setup. Reaction was carried out using handheld UV lamp at room temperature.

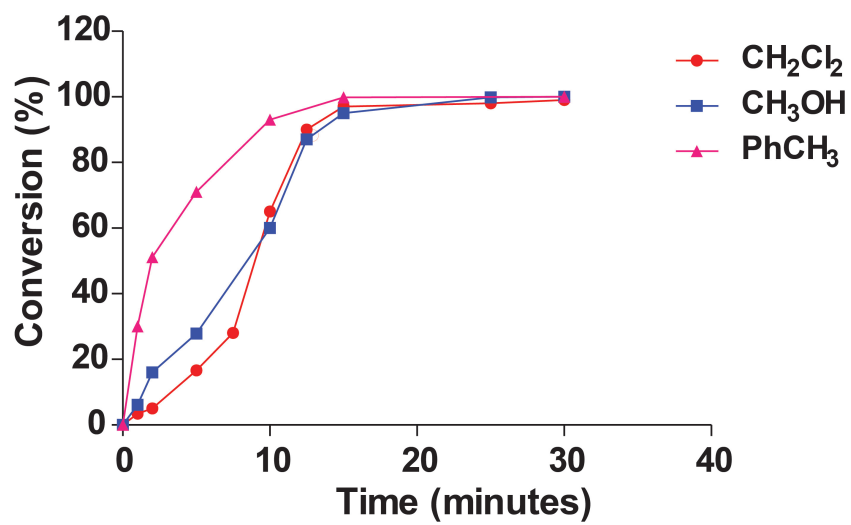

**Fig. S2.** TEC reaction time profile. The conversion was based on FK506 consumption followed under HPLC.

## Experiment section

### Chemicals and instruments:

Bulk solvents were obtained from EMD. Cysteamine, 3-thiopropionic acid, Cysteine, Dithiothreitol, 5-hexynoic acid, *N*-Ethyl-*N'*-(3-dimethylaminopropyl)carbodiimide hydrochloride (EDCI), Et<sub>3</sub>N, 1-Hydroxybenzotriazole hydrate (HOBt), 3-Aminopropanol, di-*tert*-butyl dicarbonate (Boc<sub>2</sub>O), 4-(Dimethylamino)pyridine (DMAP), *p*-Toluenesulfonyl chloride (TsCl), triethylsilane, NaN<sub>3</sub> and 2,2-Dimethoxy-2-phenylacetophenone (DPAP) were obtained from Sigma-Aldrich and Alfa-Aesar and were used directly without further purification. Other chemicals are commercially available. Boc-cysteamine was synthesized from Cysteamine following the general procedure. 3-(tritylthio)propionic acid was synthesized following the reported literature (*Langmuir*, 2008, **24**, 13581). NMR spectra were recorded on a Bruker instrument (300 MHz). Mass and NMR spectra for new compounds were recorded at the Mass Spectrometry and NMR Facilities, Department of Chemistry and Chemical Biology, University of New Mexico.

### Synthesis of compounds:

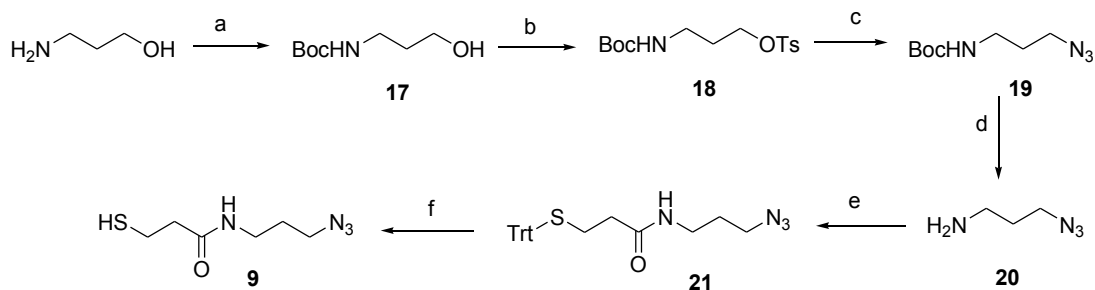

Scheme S1. a) (Boc)<sub>2</sub>O, DIPEA, MeOH (99%); b) TsCl, DMAP, Et<sub>3</sub>N, DCM (96%); c) NaN<sub>3</sub>, DMF, rt, 13 h (89%); d) TFA/DCM, rt, 1 h (99%); e) HATU, DIPEA, DCM, rt, overnight (92%); f) TFA/DCM(v/v= 2: 8), Et<sub>3</sub>SiH, rt, 1h (94%).

#### Prepare of compound 17

3-Aminopropanol (7.0 g, 92 mmol) dissolved in methanol (100 mL) was successively treated with di-*tert*-butyl dicarbonate (22.0 g, 101.2 mmol) and di-*iso*-propylethylamine (32 mL, 184 mmol) stir overnight at room temperature. After removal of the solvent under reduced pressure, the product was dissolved in DCM (100 mL). The organic layer was washed with 10 % citric acid (X 2). The aqueous layers were extracted with DCM. The combined organic layers were dried over sodium sulfate. Removal of the solvent under vacuum gave compound **17** as colorless viscous oil (17.5 g, yield: 99 %). <sup>1</sup>H NMR (CDCl<sub>3</sub>, 300 MHz): 4.78 (bs, 1H), 3.67-3.63 (t, *J* = 11.4 Hz, 2H), 3.29-3.25 (t, *J* = 12.3 Hz, 2H), 1.69- 1.63 (m, 2H), 1.44 (s, 9H). <sup>13</sup>C NMR (CDCl<sub>3</sub>, 300 MHz): 157.50, 79.64, 59.26, 36.97, 32.89, 28.36.

#### Prepare of compound 18

Compound **17** (3.50 g, 20 mmol), Et<sub>3</sub>N (2.02 g, 20 mmol) and DMAP (0.244g, 2 mmol) were stirred in DCM about 5 min, then add TsCl (4.00 g, 21 mmol) and stirred further 2 h at room temperature. Colorless viscous solid was

obtained after purification by silica gel column chromatography using hexane/ethyl acetate (v/v= 2: 1) as an eluting solvent ( $R_f$ = 0.72). Yield: 96 %.  $^1\text{H}$  NMR ( $\text{CDCl}_3$ , 300 MHz): 7.79-7.77 (d,  $J$  = 8.4 Hz, 2H), 7.36-7.33 (d,  $J$  = 8.1 Hz, 2H), 4.61 (bs, 1H), 4.09-4.05 (t,  $J$  = 12.0 Hz, 2H), 3.15 (s, 2H), 2.44 (s, 3H), 1.87- 1.79 (m, 2H), 1.41 (s, 9H).  $^{13}\text{C}$  NMR ( $\text{CDCl}_3$ , 300 MHz): 155.87, 144.91, 129.92, 127.88, 79.36, 68.00, 36.82, 29.26, 28.35, 21.64.

#### Prepare of compound 19

Compound **18** (3.29 g, 10 mmol) and  $\text{NaN}_3$  (3.30 g, 30 mmol) were stirred in THF/ $\text{H}_2\text{O}$  (v/v= 5: 1) for 2 h. The mixture was extracted with ethyl acetate; the organic layers were combined, washed three times with  $\text{NaHCO}_3$  and brine, and subsequently dried with anhydrous  $\text{Na}_2\text{SO}_4$ . Colorless viscous solid was obtained after the solvent was removed under reduced pressure. Yield: 89%.  $^1\text{H}$  NMR ( $\text{CDCl}_3$ , 300 MHz): 4.66 (bs, 1H), 3.37-3.33 (t,  $J$  = 13.2 Hz, 2H), 3.22-3.18 (t,  $J$  = 12.9 Hz, 2H), 1.80- 1.71 (m, 2H), 1.43 (s, 9H).  $^{13}\text{C}$  NMR ( $\text{CDCl}_3$ , 300 MHz): 155.94, 79.42, 49.11, 38.10, 29.29, 28.37. TOF-HRMS (m/z) found (calcd.) for  $\text{C}_8\text{H}_{16}\text{N}_4\text{OS}$  (M):  $[\text{M}+\text{Na}]^+$ , 223.1171 (223.1171).

#### Prepare of compound 20

Compound **19** (1g, 5 mmol) was stirred in DCM/TFA (v/v= 5: 1) for 1 h, white solid was obtained after the solvent was removed under reduced pressure. Yield: 99%.  $^1\text{H}$  NMR ( $\text{CDCl}_3$ , 300 MHz): 8.30 (bs, 2H), 3.57 (s, 2H), 3.18 (s, 2H), 2.09 (s, 2H).  $^{13}\text{C}$  NMR ( $\text{CDCl}_3$ , 300 MHz): 48.51, 37.81, 26.80. TOF-HRMS (m/z) found (calcd.) for  $\text{C}_3\text{H}_8\text{N}_4$  (M):  $[\text{M}+\text{H}]^+$ , 101.0814 (101.0827).

#### Prepare of compound 21

3-(tritylthio)propanoic acid (697 mg, 2.0 mmol), HATU (836 mg, 2.2 mmol), DIPEA (516 mg, 4.0 mmol), and compound **20** (220 mg, 2.2 mmol) were stirred at room temperature overnight in DCM. White solid was obtained after purification by silica gel column chromatography using hexane/ethyl acetate (v/v= 1: 1) as an eluting solvent ( $R_f$ = 0.65). Yield: 96 %.  $^1\text{H}$  NMR (Acetone- $d_6$ , 300 MHz): 7.41-7.39 (m, 6H), 7.34-7.28 (m, 6H), 7.26-7.20 (m, 3H), 7.14 (bs, 1H), 3.39-3.35 (t,  $J$  = 13.5 Hz, 2H), 3.27-3.20 (q,  $J$  = 19.2 Hz, 2H), 2.44-2.39 (t,  $J$  = 14.7 Hz, 2H), 2.22-2.17 (t,  $J$  = 14.7 Hz, 2H), 1.77- 1.68 (m, 2H).  $^{13}\text{C}$  NMR (Acetone- $d_6$ , 300 MHz): 171.11, 145.83, 130.34, 128.70, 127.47, 67.17, 49.66, 37.10, 35.40, 28.53. TOF-HRMS (m/z) found (calcd.) for  $\text{C}_{25}\text{H}_{26}\text{N}_4\text{OS}$  (M):  $[\text{M}+\text{Na}]^+$ , 453.1717 (453.1725),  $[2\text{M}+\text{Na}]^+$ , 883.3400 (883.3552).

#### Prepare of compound 9

To a solution of compound **21** (215 mg, 0.5 mmol) in trifluoroacetic acid (TFA, 1mL) and  $\text{CH}_2\text{Cl}_2$  (2 mL) was added triethylsilane (174 mg, 1.5 mmol). The resulting mixture was stirred for a half hour at room temperature. After evaporating the reaction solvent,  $\text{CH}_2\text{Cl}_2$  (20 mL) was added to the resulting residues. The organic layer was extracted with  $\text{H}_2\text{O}$  (10 mL). The aqueous layer was then evaporated to give the transparent oil product. Yield: 94 %.  $^1\text{H}$  NMR ( $\text{CDCl}_3$ , 300 MHz): 5.93 (s, 1H), 3.41-3.36 (m, 4H), 2.84-2.80 (q,  $J$  = 12.9 Hz, 2H), 2.52-2.49 (t,  $J$  = 7.8 Hz, 2H), 1.84-1.79 (m, 2H), 1.62-1.59 (t,  $J$  = 9.9 Hz, 1H).  $^{13}\text{C}$  NMR ( $\text{CDCl}_3$ , 300 MHz): 171.58, 49.45, 40.46, 37.48, 28.79, 20.54. TOF-HRMS (m/z) found (calcd.) for  $\text{C}_6\text{H}_{12}\text{N}_4\text{OS}$  (M):  $[\text{M}+\text{Na}]^+$ , 211.0628 (211.0630),  $[2\text{M}+\text{Na}-2\text{H}]^+$ , 397.1207 (397.1207).

#### Synthesis of compound 3

FK506 (201.0 mg, 0.25 mmol), Boc-cysteamine (46.0 mg, 0.26 mmol), DPAP (3.2 mg, 12.5 nmol) and 0.4 mL dichloromethane were put in a vials, and stirred 15 min under UV light. White solid (246 mg, 98% yield) was

obtained after purification by silica gel column chromatography using ethyl acetate as an eluting solvent ( $R_f = 0.5$ ).  $^1\text{H}$  NMR (300 MHz,  $\text{CDCl}_3$ ): 5.33-5.21(d,  $J = 36.8$  Hz, 1H), 5.12-5.08 (m, 2H), 4.88-4.40 (m, 1H), 3.94-3.57 (m, 3H), 3.41-3.29 (m, 9H), 3.05-2.95 (m, 2H), 2.78-2.50 (m, 6H), 2.38-1.26 (m, 45H), 1.07-0.82(m, 13H). TOF-HRMS (m/z) found (calcd.) for  $\text{C}_{51}\text{H}_{84}\text{N}_2\text{O}_{14}\text{S}$  (M):  $[\text{M}+\text{Na}]^+$ , 1003.5583 (1003.5541).

#### Synthesis of compound 4

Method A: compound 3 dissolved in DCM/TFA and stir 1 h at room temperature.

Method B: FK506 (201.0 mg, 0.25 mmol), cysteamine (19.3 mg, 0.26 mmol), DPAP (3.2 mg, 12.5 nmol) and 0.4 mL methanol were put in a vials, and stirred 15 min under UV light. White solid (211 mg, 96% yield) was obtained after purification by silica gel column chromatography using ethyl DCM/methanol (v/v= 5: 1) as an eluting solvent ( $R_f = 0.56$ ).  $^1\text{H}$  NMR (300 MHz, Acetone- $d_6$ ): 6.93-6.80 (m, 1H), 6.45-6.29 (m, 1H), 5.30-4.98 (m, 3H), 4.66-4.34 (m, 1 H), 4.13-4.02 (m, 2H), 3.80-3.32 (m, 11H), 3.02-3.00 (m, 2H), 2.68-2.50 (m, 4H), 2.49-1.58 (m, 36 H), 1.21-0.88 (m, 13H). TOF-HRMS (m/z) found (calcd.) for  $\text{C}_{46}\text{H}_{76}\text{N}_2\text{O}_{12}\text{S}$  (M):  $[\text{M}+\text{H}]^+$ , 881.5215 (881.5197).

#### Synthesis of compound 6

5-hexynoic acid (28.0 mg, 0.25 mmol), EDCI (52.7 mg, 0.275 mmol), HOBt (37.1 mg, 0.275 mmol), and  $\text{Et}_3\text{N}$  (50.5 mg, 0.5 mmol), stir about 1 h in DCM, then add compound 4 (242 mg, 0.275 mmol) and stir overnight. White solid (190 mg, 78% yield) was obtained after purification by silica gel column chromatography using ethyl acetate as an eluting solvent ( $R_f = 0.42$ ).  $^1\text{H}$  NMR (300 MHz,  $\text{CDCl}_3$ ): 6.80-6.69 (m, 1H), 6.34-6.10 (m, 1H), 5.97 (s, 1H), 5.26-4.85 (m, 2H), 4.75-4.72 (m, 1H), 4.49-4.16 (m, 1H), 3.92-3.72 (m, 1H), 3.59-3.26 (m, 11H), 3.06-2.92 (m, 2H), 2.63-2.61 (m, 2H), 2.49-2.23 (m, 6H), 2.12-1.23 (m, 39H), 1.80-0.83 (m, 13H). TOF-HRMS (m/z) found (calcd.) for  $\text{C}_{52}\text{H}_{82}\text{N}_2\text{O}_{13}\text{S}$  (M):  $[\text{M}+\text{H}]^+$ , 979.5360 (976.2860).

#### Synthesis of compound 11

FK506 (201.0 mg, 0.25 mmol), 3-thiopropionic acid (28.0 mg, 0.26 mmol), DPAP (3.2 mg, 12.5 nmol) and 0.4 mL dichloromethane were put in a vials, and stirred 15 min under UV light. White solid (222 mg, 98% yield) was obtained after purification by silica gel column chromatography using ethyl acetate/ acetone (v/v= 1: 1) as an eluting solvent ( $R_f = 0.51$ ).  $^1\text{H}$  NMR (300 MHz,  $\text{CDCl}_3$ ): 5.32-5.20(d,  $J = 36.4$  Hz, 1H), 5.10-5.00 (m, 2H), 4.75-4.30 (m, 1H), 3.94-3.54 (m, 3H), 3.40-3.29 (m, 11H), 3.05-2.95 (m, 2H), 2.75-2.51 (m, 6H), 2.38-1.25 (m, 36H), 1.06-0.82(m, 13H). TOF-HRMS (m/z) found (calcd.) for  $\text{C}_{47}\text{H}_{75}\text{NO}_{14}\text{S}$  (M):  $[\text{M}-\text{H}]^+$ , 908.4821 (908.4830).

#### Synthesis of compound 12

FK506 (201.0 mg, 0.25 mmol), compound 9 (48.9 mg, 0.26 mmol), DPAP (3.2 mg, 12.5 nmol) and 0.4 mL DCM were put in a vials, and stirred 15 min under UV light. Pale yellow solid (235 mg, 95% yield) was obtained after purification by silica gel column chromatography using ethyl acetate/ acetone (v/v= 4: 1) as an eluting solvent ( $R_f = 0.56$ ).  $^1\text{H}$  NMR (300 MHz,  $\text{CDCl}_3$ ): 6.50 (s, 1H), 5.32-4.95 (m, 3H), 4.74-4.22 (m, 2H), 3.91-3.53 (m, 2H), 3.38-3.27 (m, 17H), 2.98-2.95 (m, 4H), 2.80-2.64 (m, 4H), 2.58-2.39 (m, 4H), 2.15-1.34 (m, 34H), 0.98-0.80 (m, 13H). TOF-HRMS (m/z) found (calcd.) for  $\text{C}_{50}\text{H}_{81}\text{N}_5\text{O}_{13}\text{S}$  (M):  $[\text{M}+\text{Na}]^+$ , 1014.5485 (1014.5449).

#### Synthesis of compound 13

FK506 (201.0 mg, 0.25 mmol), Cysteine (31.5 mg, 0.26 mmol), DPAP (3.2 mg, 12.5 nmol) and 0.5 mL methanol/water (1: 1) were put in a vials, and stirred 15 min under UV light. White solid (220 mg, 95% yield) was

obtained after purification by silica gel column chromatography using acetone/methanol (v/v= 1: 1) as an eluting solvent ( $R_f$ = 0.46).  $^1\text{H}$  NMR (300 MHz,  $\text{CDCl}_3$ ): 5.27-4.95 (m, 3H), 4.63-4.33 (m, 1H), 4.08-3.97 (m, 2H), 3.70-3.41 (m, 3H), 3.38-2.75 (m, 13H), 2.09-1.20 (m, 34H), 0.96-0.71(m, 13H). TOF-HRMS (m/z) found (calcd.) for  $\text{C}_{47}\text{H}_{76}\text{N}_2\text{O}_{14}\text{S}$  (M):  $[\text{M}+\text{H}]^+$ , 925.5076 (925.5096).

### Synthesis of compound 15

FK506 (201.0 mg, 0.25 mmol), dithiothreitol (20.2 mg, 0.13 mmol), DPAP (3.2 mg, 12.5 nmol) and 0.4 mL dichloromethane were put in a vials, and stirred 15 min under UV light. White solid (220 mg, 99% yield) was obtained after purification by silica gel column chromatography using ethyl acetate/acetone (v/v=1:1) as an eluting solvent ( $R_f$ = 0.56).  $^1\text{H}$  NMR (300 MHz,  $\text{CDCl}_3$ ): 5.33-5.20 (d,  $J$ = 36.5 Hz, 2H), 5.10-5.06 (m, 4H), 4.74-4.28 (m, 4H), 3.92-3.57 (m, 8H), 3.41-3.30 (m, 22H), 3.06-2.97 (m, 4H), 2.74-2.54 (m, 14H), 2.30-1.25 (m, 64H), 1.08-0.83 (m, 26H). TOF-HRMS (m/z) found (calcd.) for  $\text{C}_{92}\text{H}_{148}\text{N}_2\text{O}_{26}\text{S}_2$  (M):  $[\text{M}+\text{Na}]^+$ , 1783.9602 (1783.9659).

### Plasmid construction

All DNA fragments were amplified by PCR (Polymerase chain reaction) from other intermediate constructs. PCR was carried out with Phusion DNA Polymerase (New England Biolabs), PfuUltra II Fusion HotStart DNA Polymerase (Agilent Technologies) under S1000 thermal cycler with Dual 48/48 Fast Reaction Module (Bio-Rad).

- 1) For SV-ires-GalDBD-3FKBP12, a DNA construct SV-VP16-Frb-ires-GalDBD-FKBP12x3 (*Sci. Signal.*, 2011, **4**, rs2) was firstly digested by EcoRI and BamHI. The sticky ends of the vector were blunted by DNA Polymerase I Lg (Klenow) Fragment (New England Biolabs) under the present of dNTPs. Finally, the blunt ends were ligated by T4 DNA Ligase (New England Biolabs).
- 2) For SV-VP16-FKBP12x2, the DNA construct was first made as SV-VP16-FKBP12. SV-VP16-Frb-ires-GalDBD-FKBP12x3 was firstly digested by AscI and NotI. The PCR product of FKBP12 was inserted into the vector by recombination using the In-Fusion HD Enzyme Premix (ClonTech). The second copy of FKBP12 was inserted via the AcsI site using T4 DNA ligase.

### Cell Culture and transfection

CHO cells were cultured in Dulbecco's modified Eagle's medium (DMEM, Gibco) with 10% Fetal Bovine Serum (FBS, Atlanta Biologicals), 1×glutamate (100x from Gibco) and 1×penicillin/streptomycin (Pen/Strep, 100X from Gibco). Cells were plated with the starting concentration of 50,000 cells per well in a 24-well plate (Greiner Bio-one) the day before transfection. An amount of 0.2µg of each DNA construct was mixed with Opti-MEM (Gibco) and PEI. After incubation at room temperature for 15min, the mixture was added to the cells and cultured for 24h. Then FK506, FK1012-DT and FK1012-ZE dissolved in DMSO were added into the cell culture with the final concentration of 200nM, 100nM and 100nM respectively. Each type of the experiments, including the one with transfected DNA but without drugs, was carried out as triplets. After the incubation of 10 hours, the cells were harvested and washed by PBS buffer (Gibco) for 3 times.

### Luciferase assay

Cells in 24-well plates were frozen under the temperature of -80°C at first and then lysed with 100 µL of 1×Passive Lysis Buffer (Promega Corporation) at room temperature for 10min on a shaker. Cell lysates were then collected and centrifuged in tubes and 10µL of supernatant was added separately into a 96 well plate for Luciferase assay. 90µL

Luciferase substrate solution (5mg of D-luciferin and 7mg of coenzyme A in 33mL of Luciferase reading buffer, which includes 20mM tricine, 1.07mM  $(\text{MgCO}_3)_4\text{Mg}(\text{OH})_2 \cdot 5\text{H}_2\text{O}$ , 2.67mM  $\text{MgSO}_4$ , 0.1mM EDTA, 33.3mM dithiothreitol and 0.53mM ATP in water) was added into each well with cell lysates. The signal was read with a 3s delay and 1s integration with Clomax Multi Detection System (Promega). Obtained data were analyzed by KaleidaGraph. The shown results are from 3 experimental repeats.



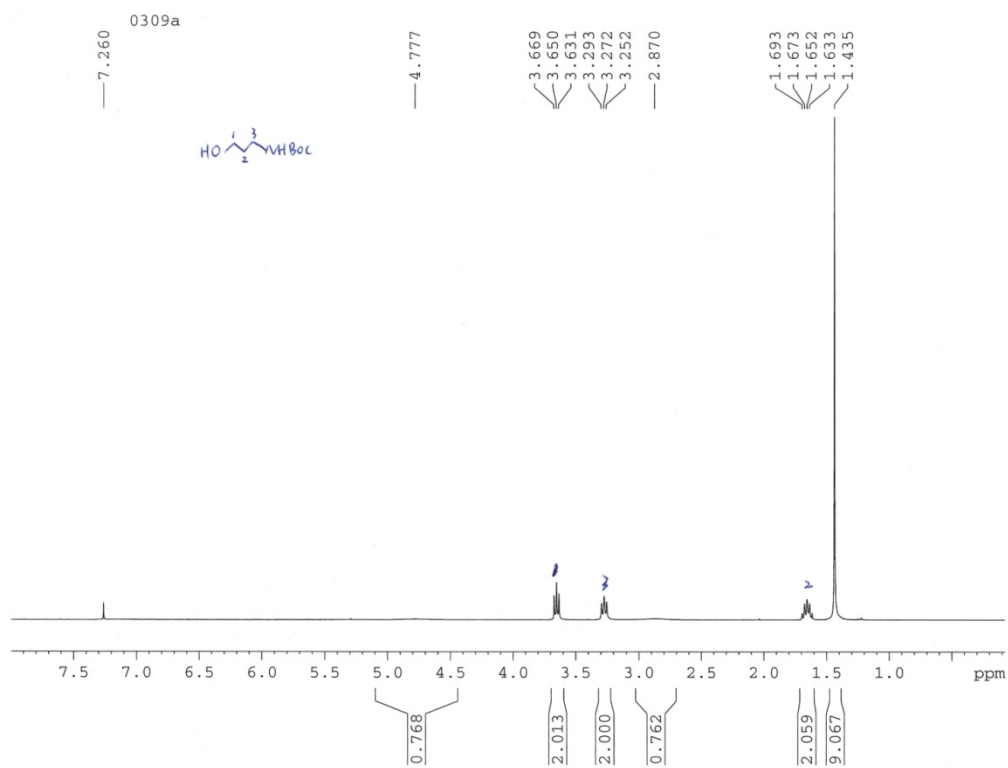

<sup>1</sup>H NMR of compound 17

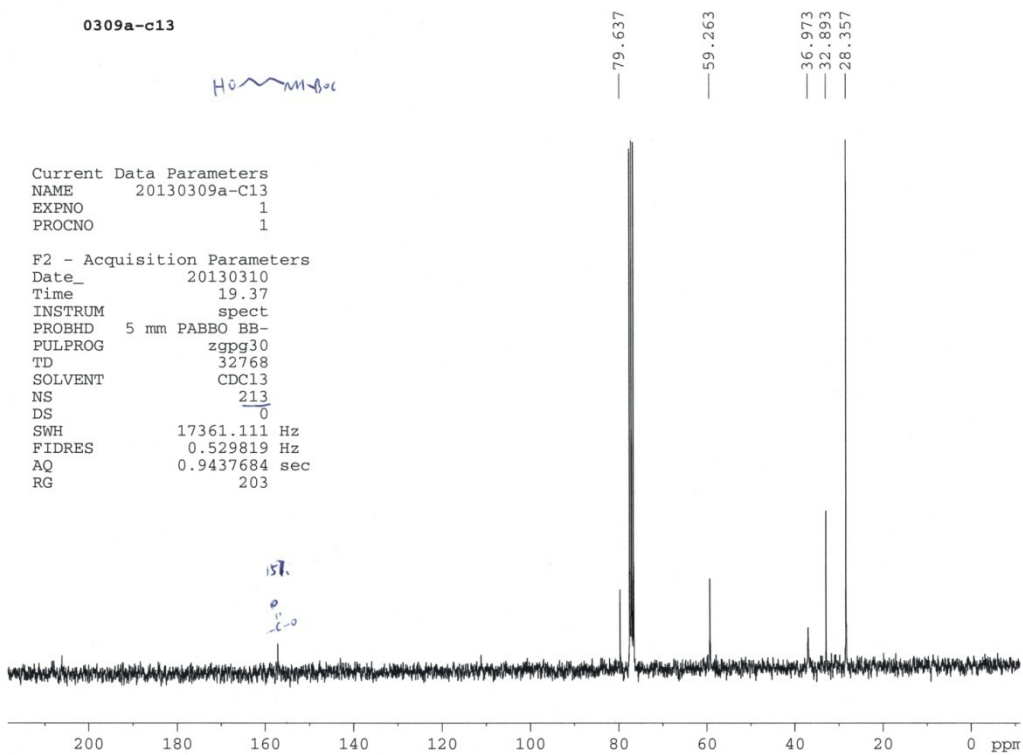

<sup>13</sup>C NMR of compound 17

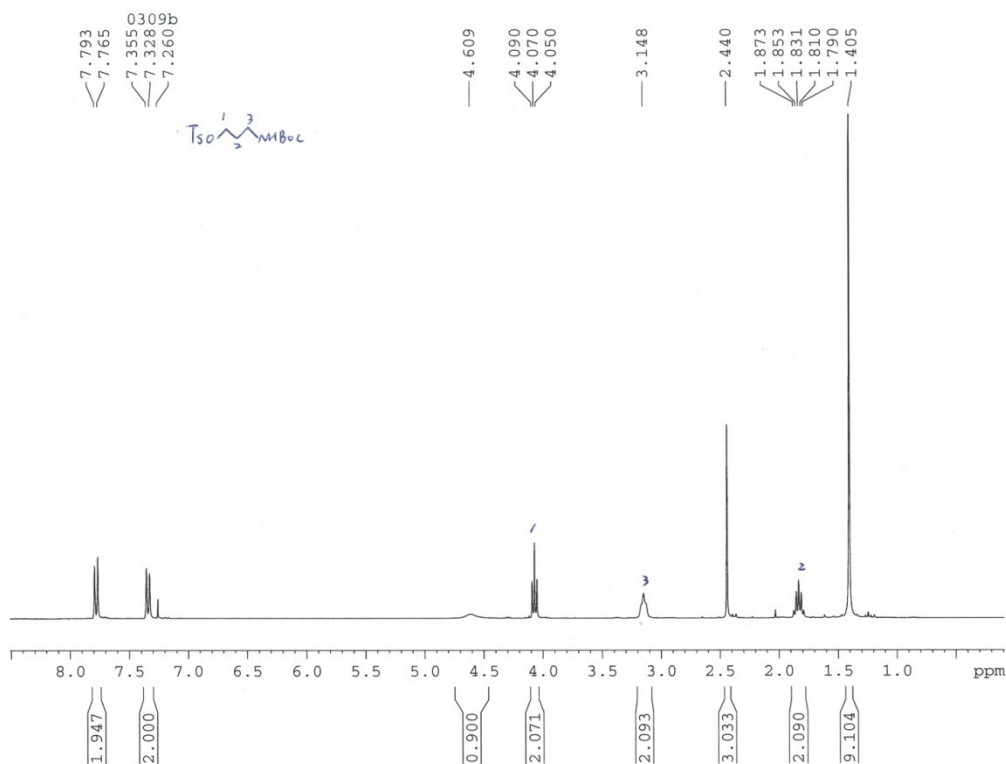

<sup>1</sup>H NMR of compound 18

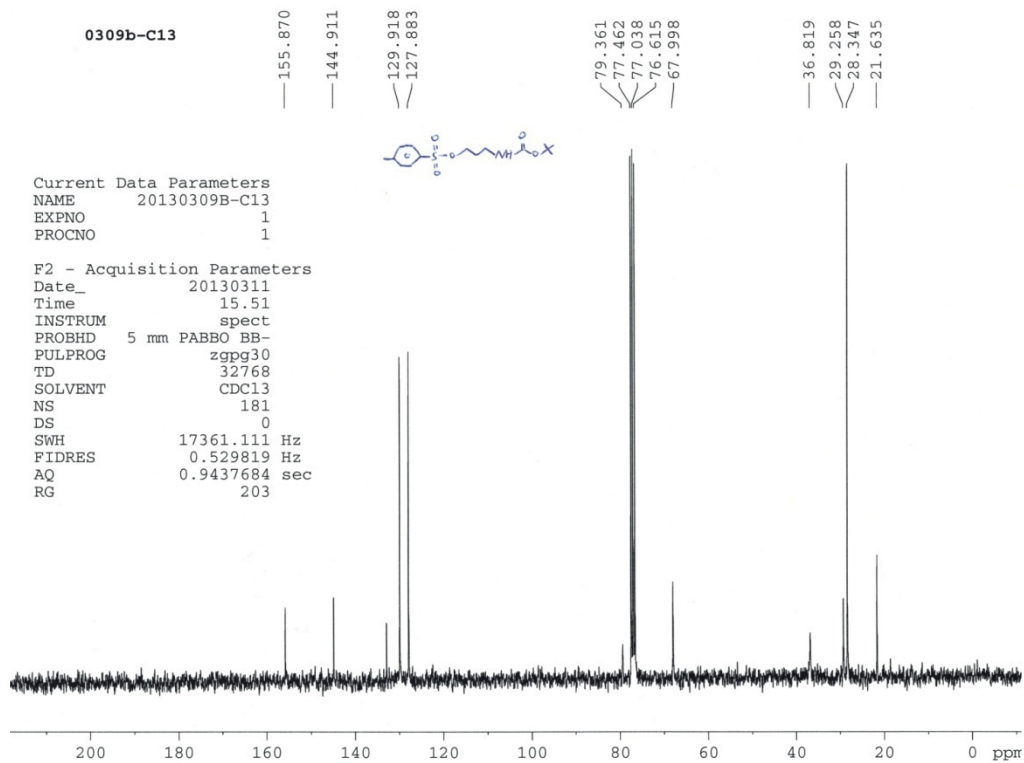

<sup>13</sup>C NMR of compound 18

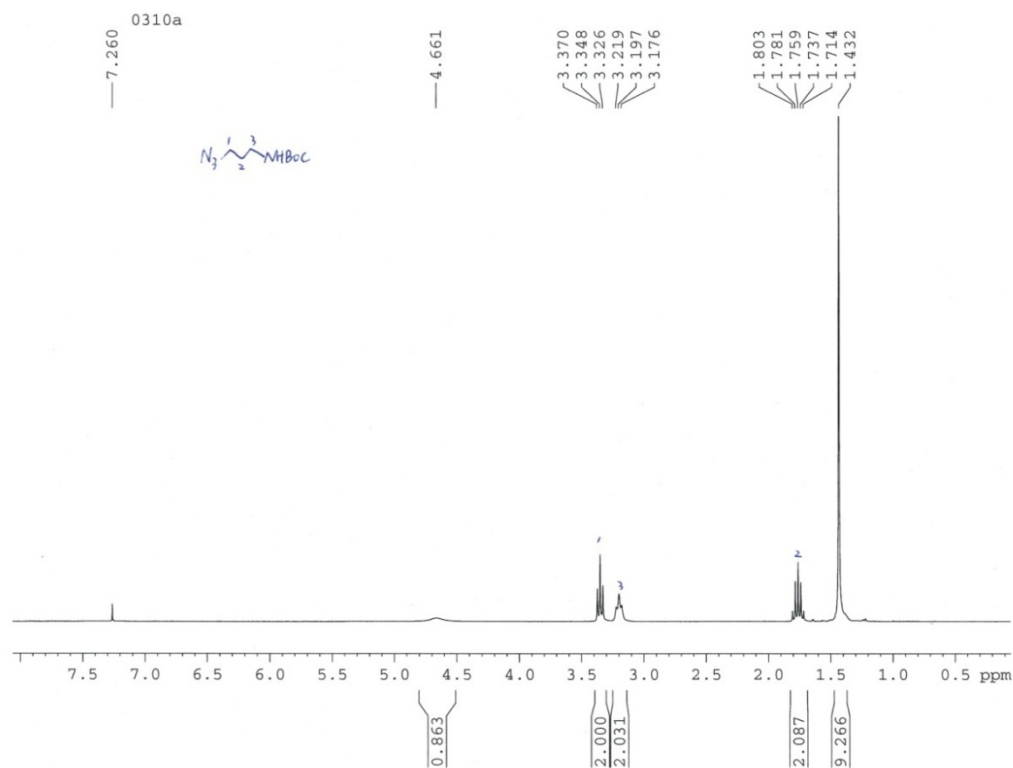

<sup>1</sup>H NMR of compound 19

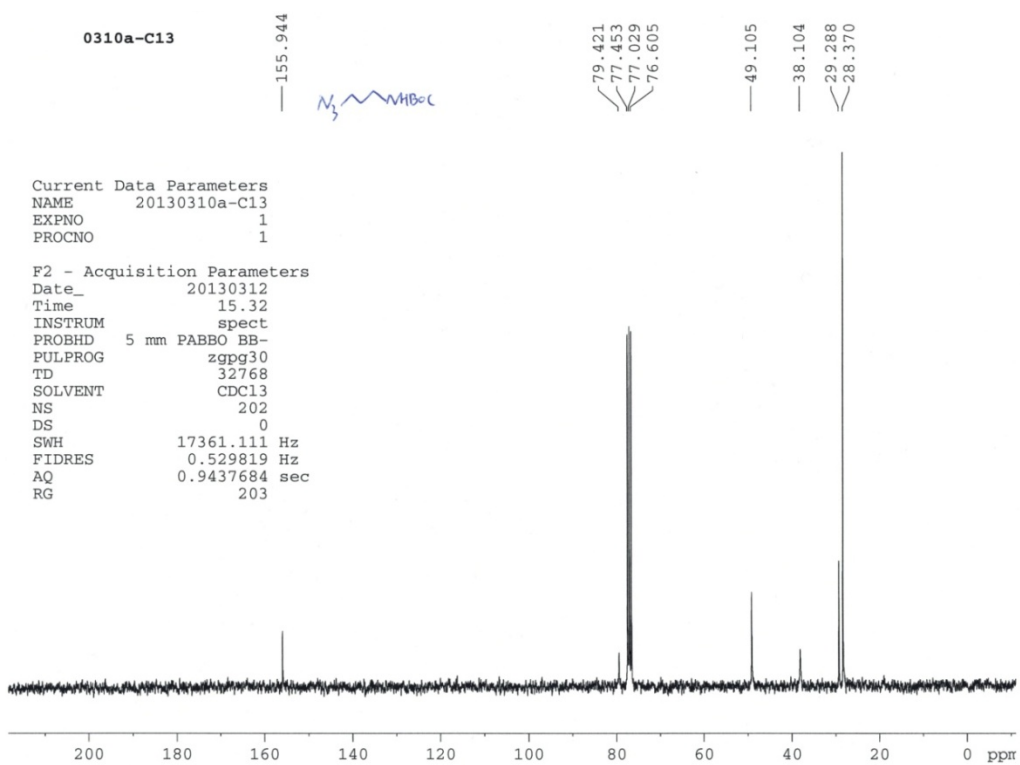

<sup>13</sup>C NMR of compound 19

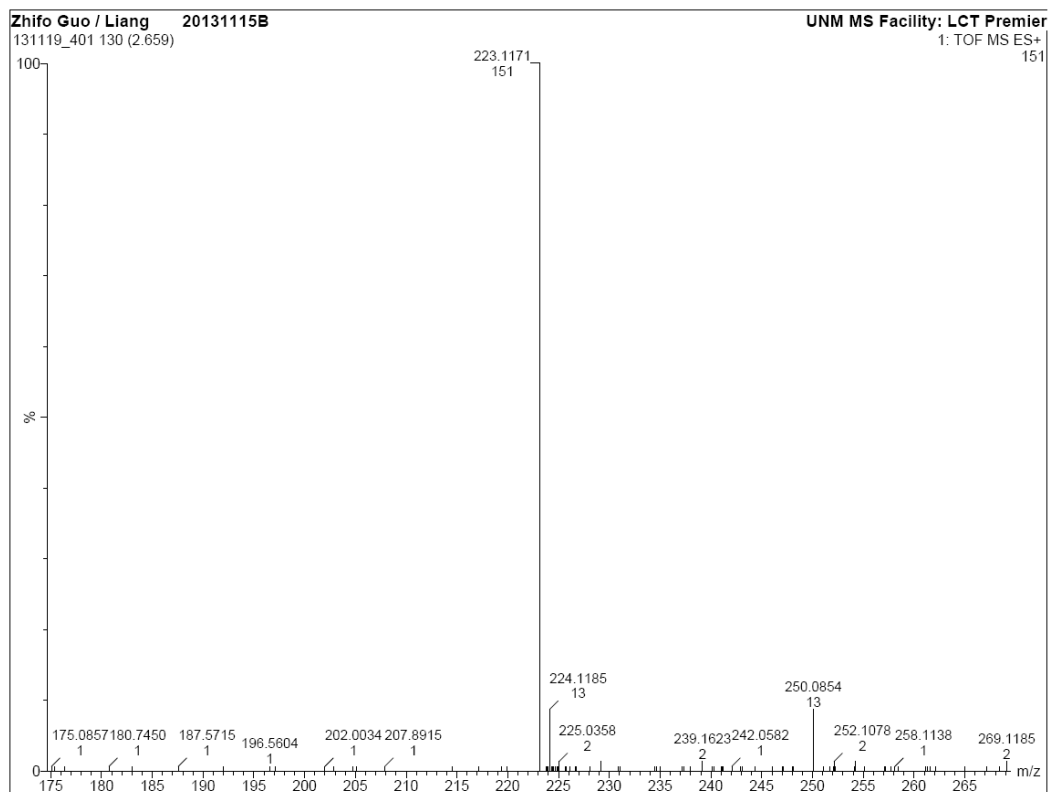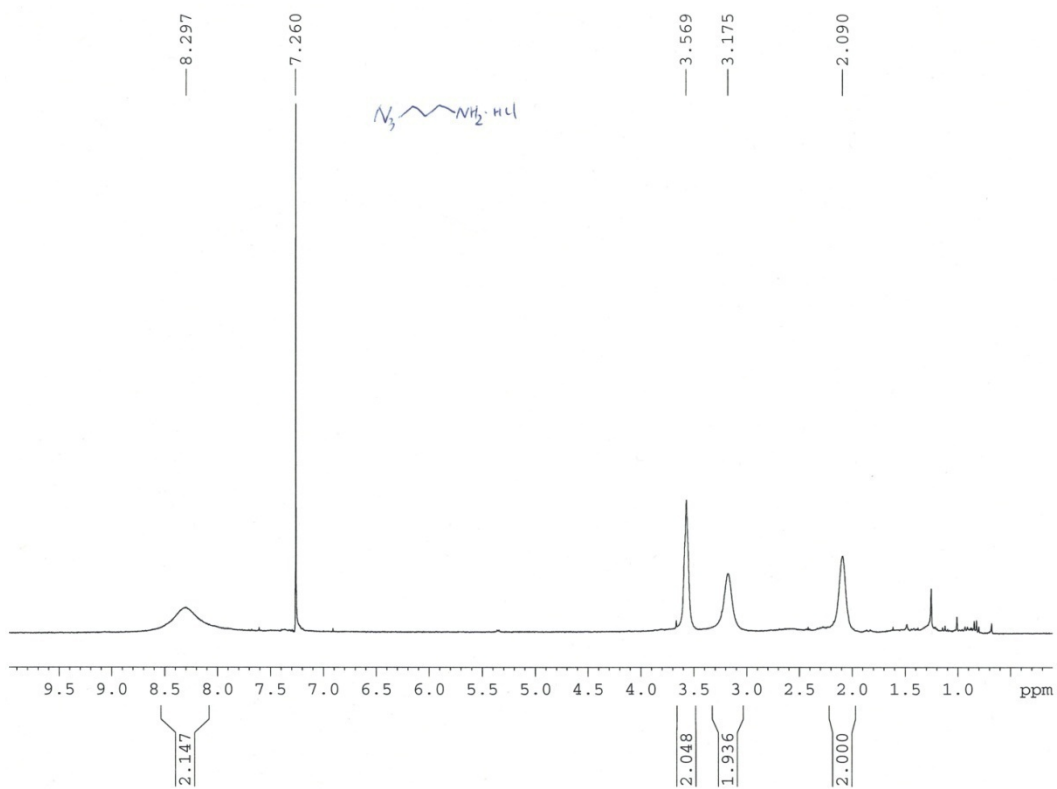

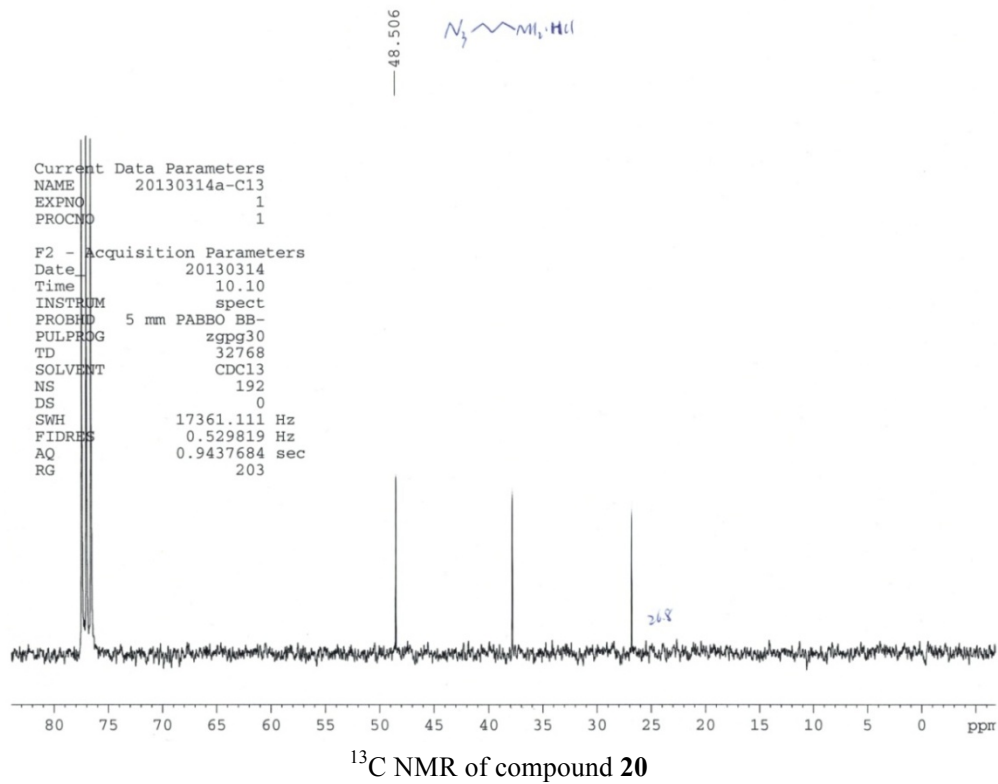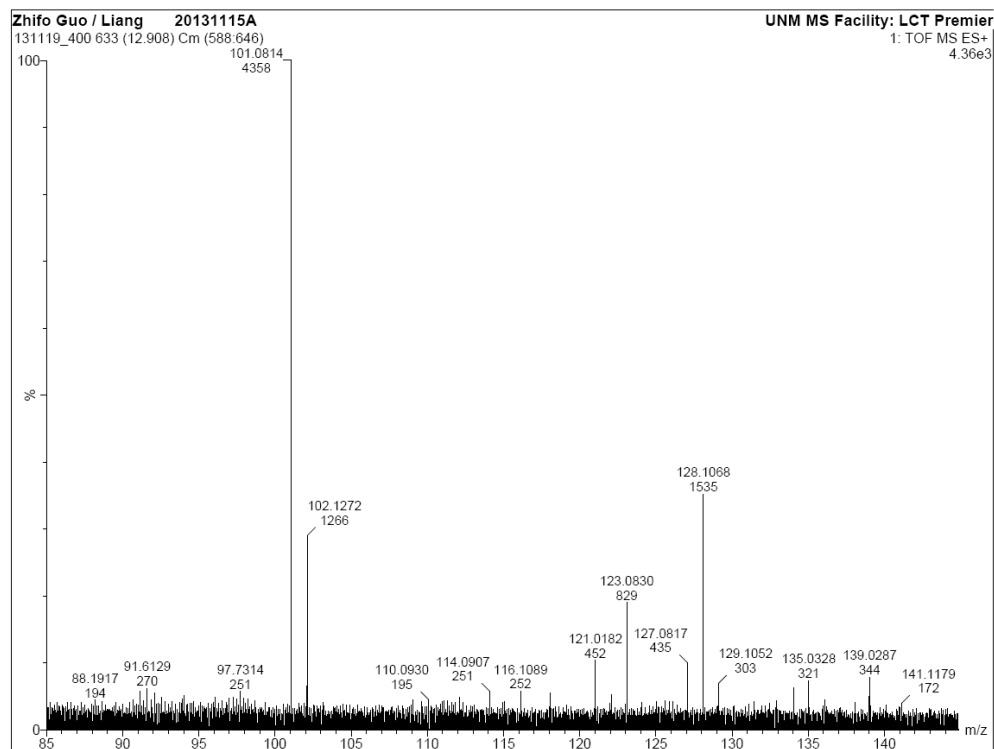

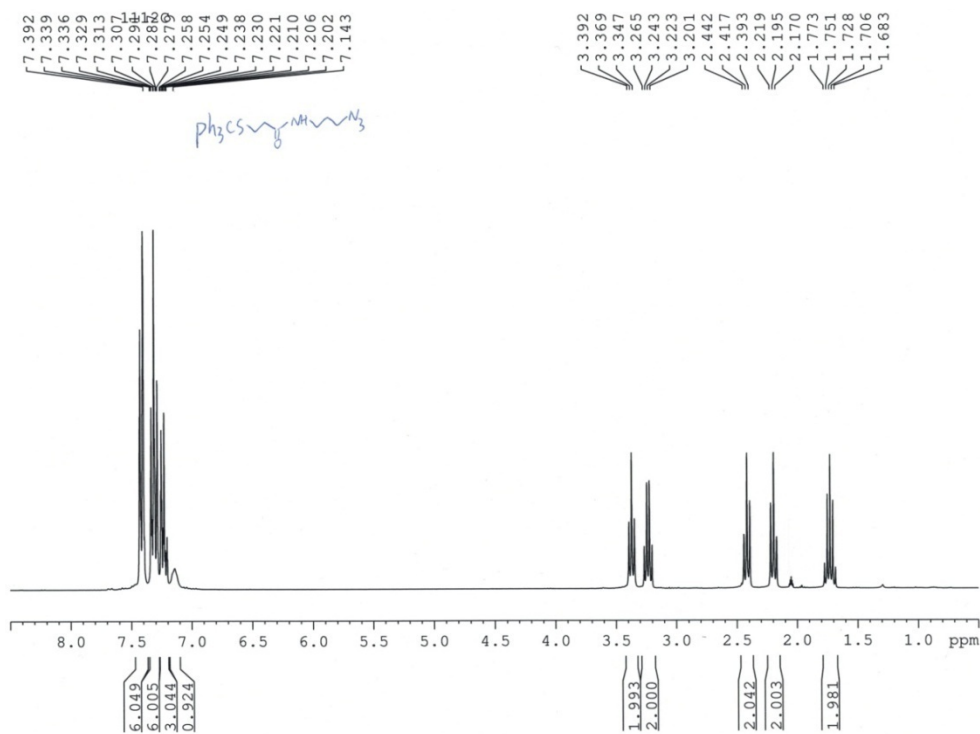

<sup>1</sup>H NMR of compound 21

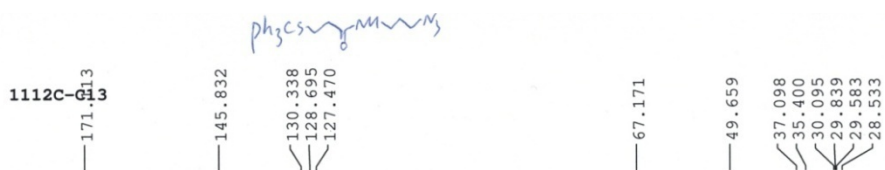

Current Data Parameters  
 NAME 20131112C-C13  
 EXPNO 1  
 PROCNO 1

F2 - Acquisition Parameters  
 Date\_ 20131113  
 Time 12.45  
 INSTRUM spect  
 PROBHD 5 mm PABBO BB-  
 PULPROG zgpg30  
 TD 32768  
 SOLVENT Acetone  
 NS 201  
 DS 0  
 SWH 17361.111 Hz  
 FIDRES 0.529819 Hz  
 AQ 0.9437184 sec  
 RG 203

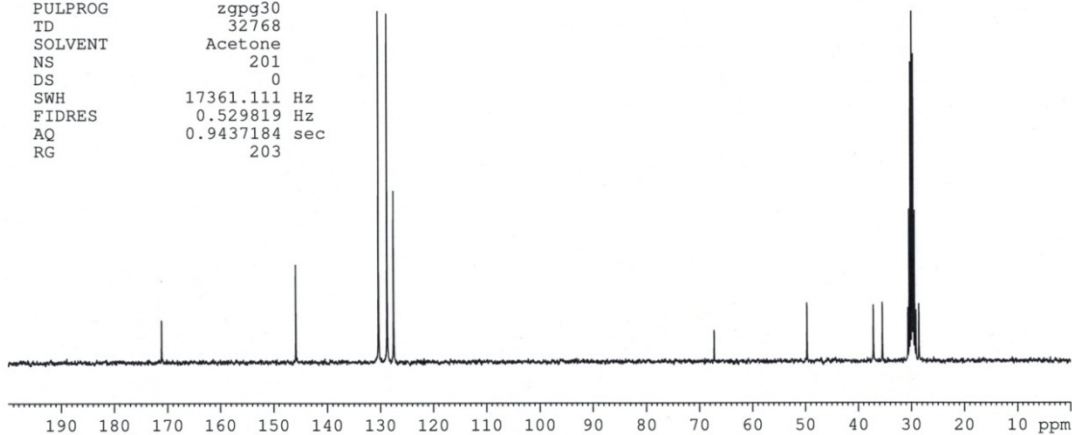

<sup>13</sup>C NMR of compound 21

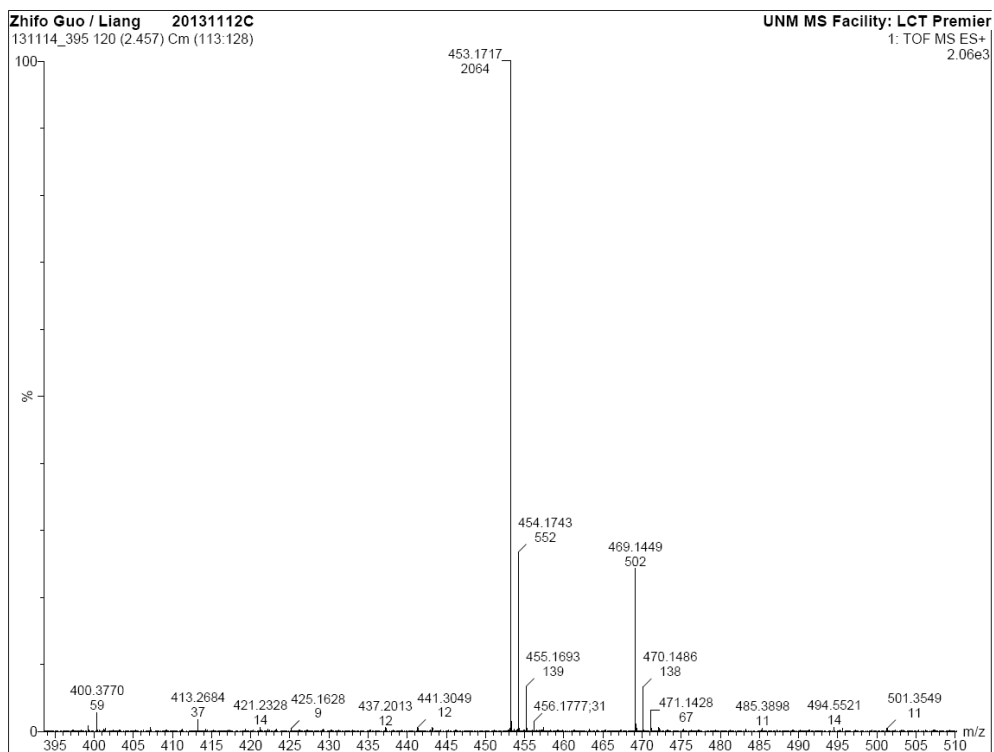

HRMS of compound 21

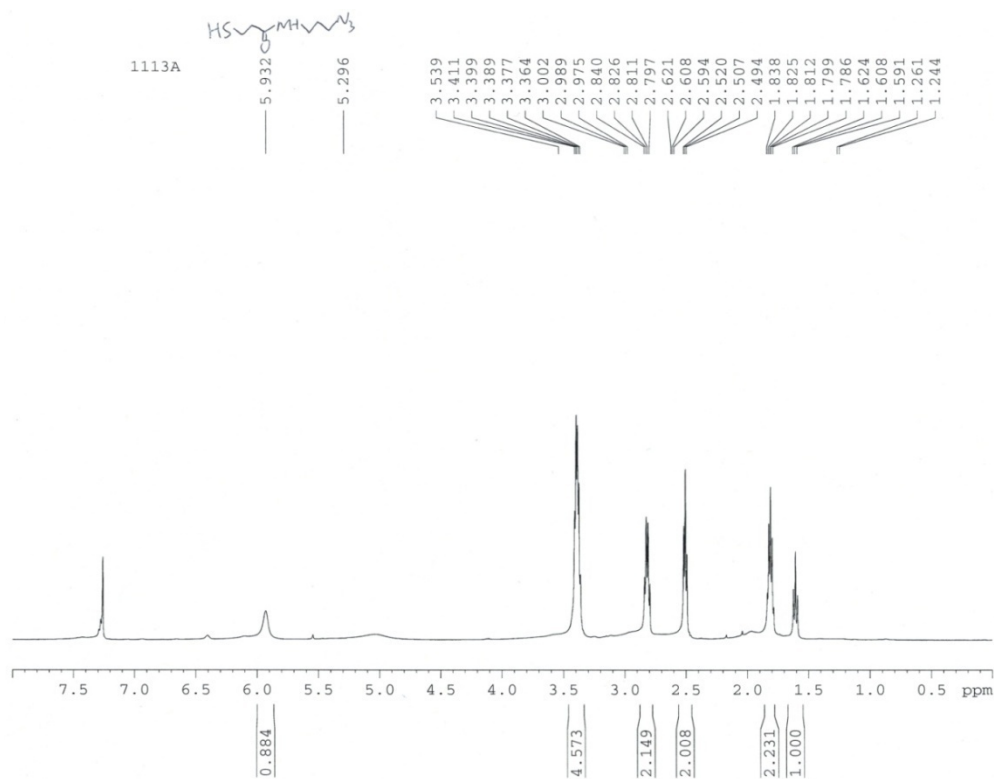

<sup>1</sup>H NMR of compound 9

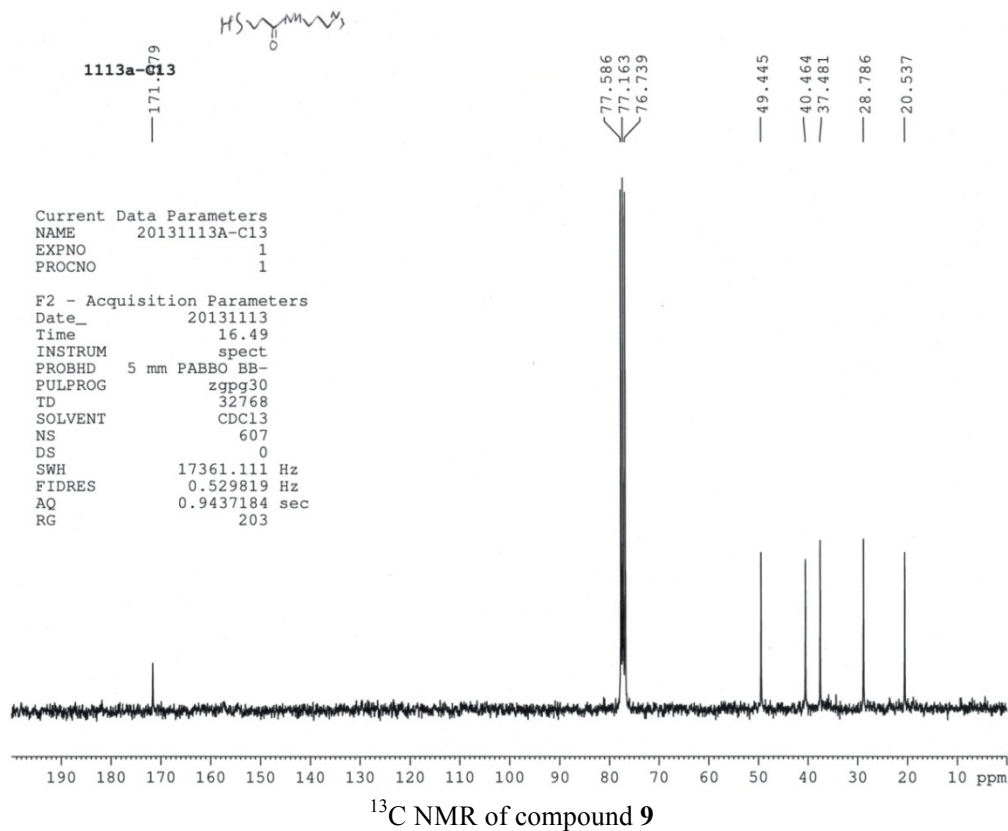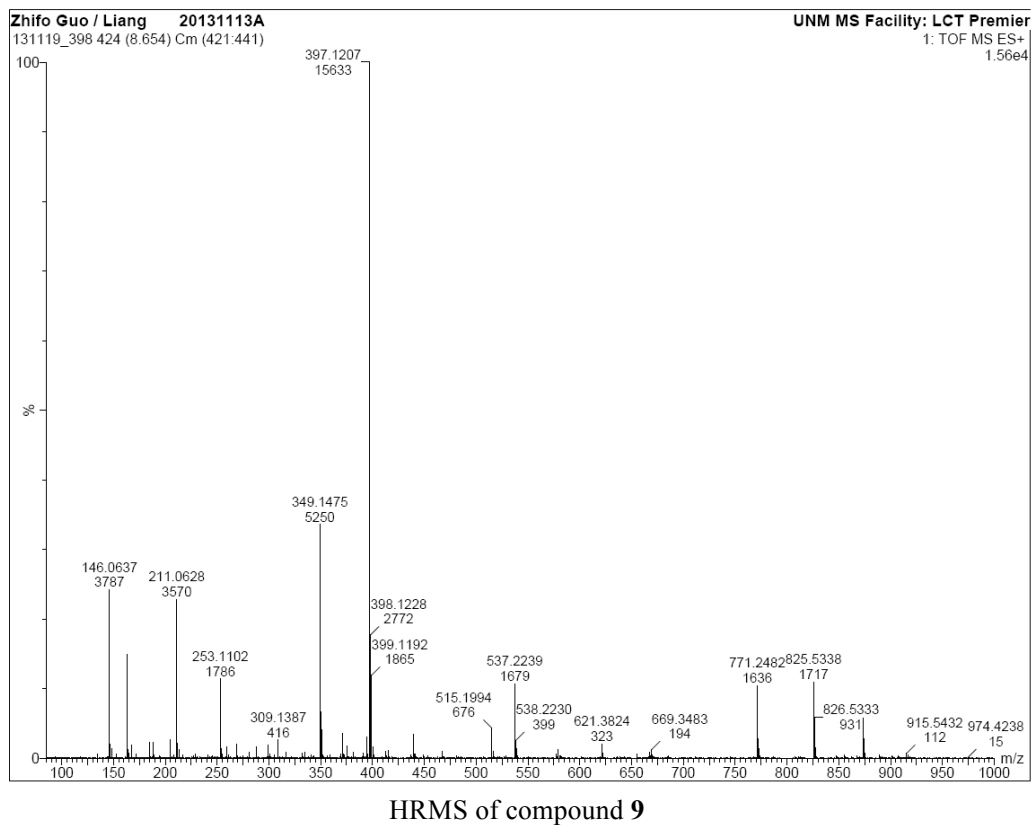



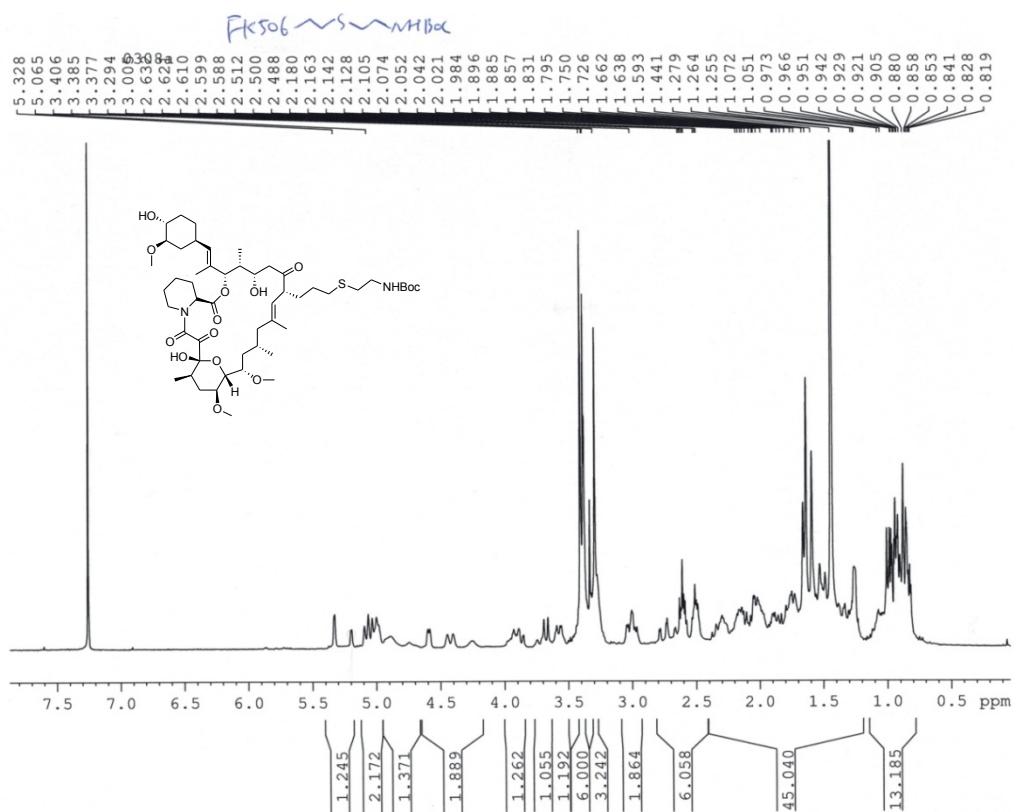

<sup>1</sup>H NMR of compound 3

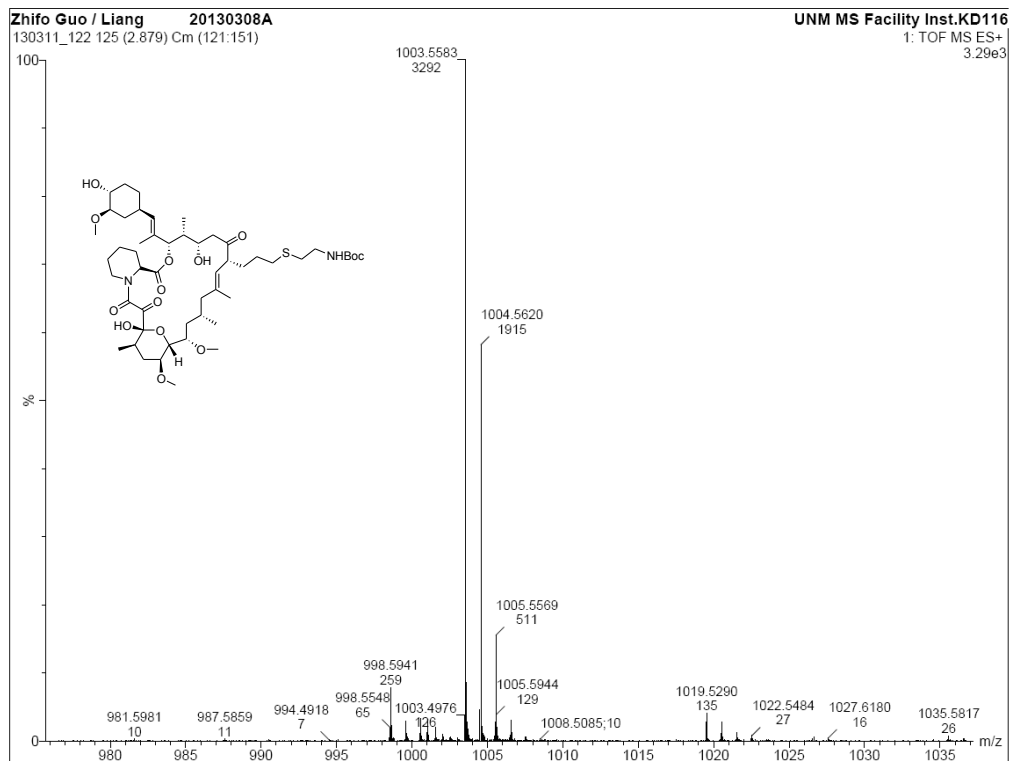

HRMS of compound 3

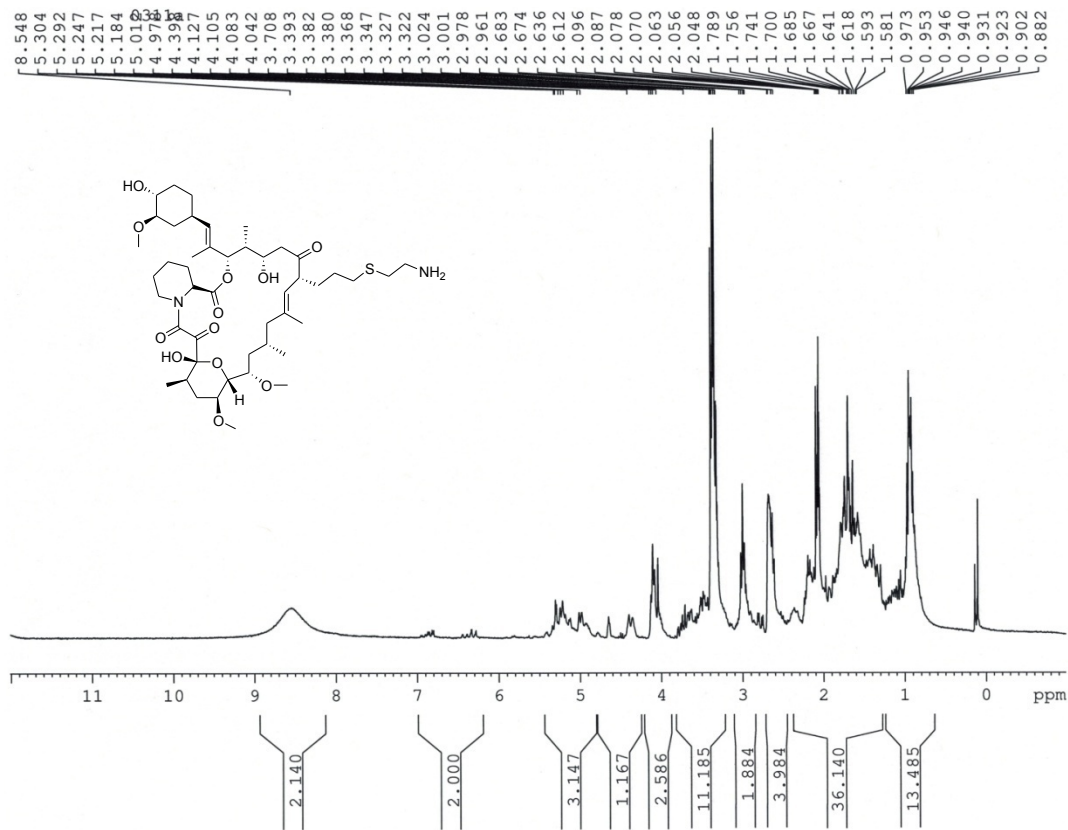

<sup>1</sup>H NMR of compound 4

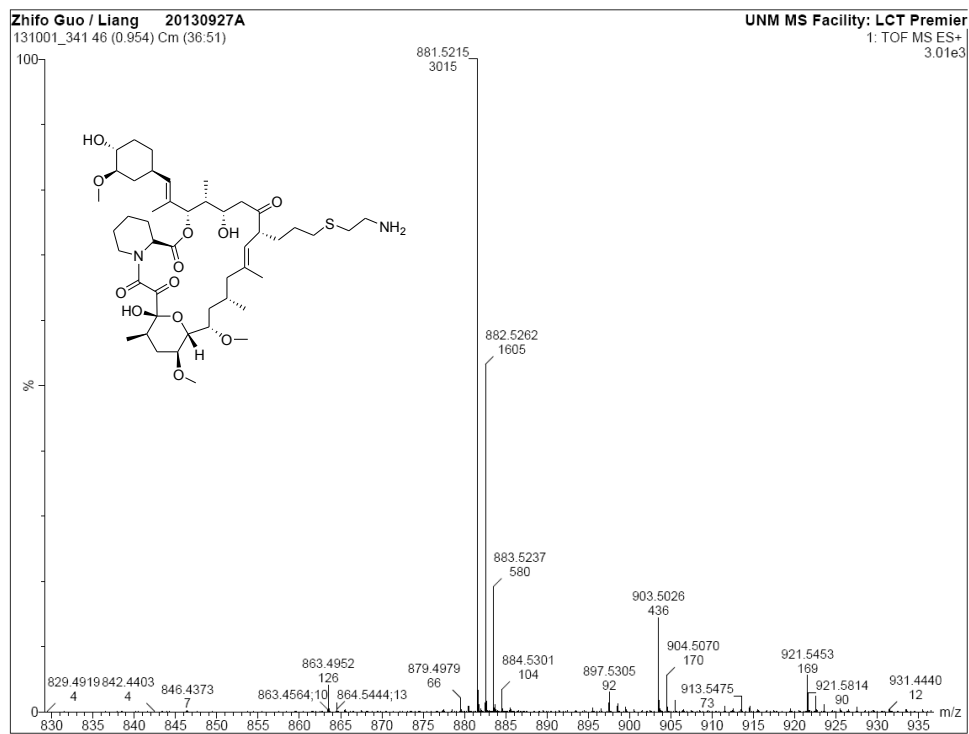

HRMS of compound 4

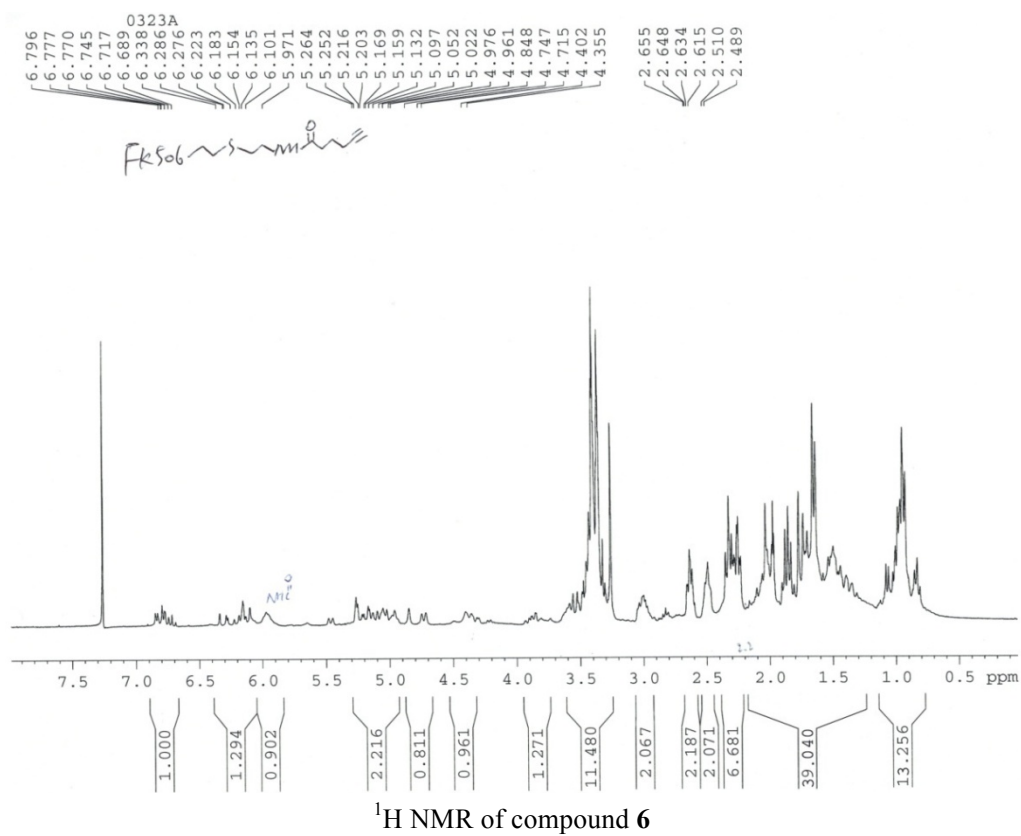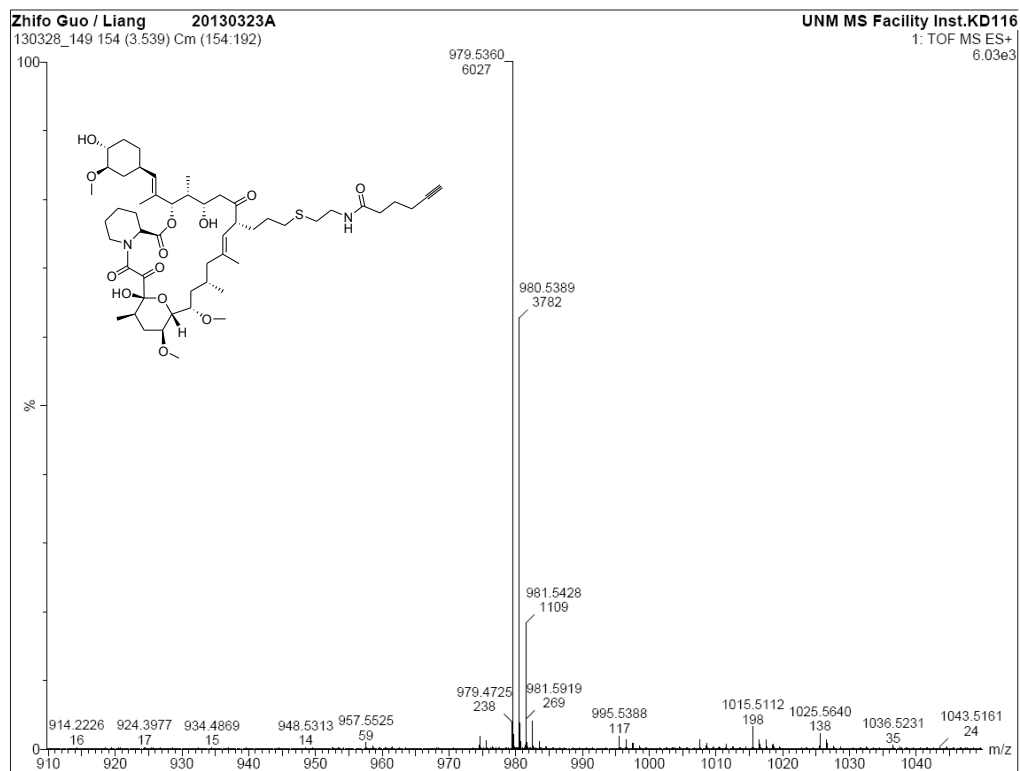

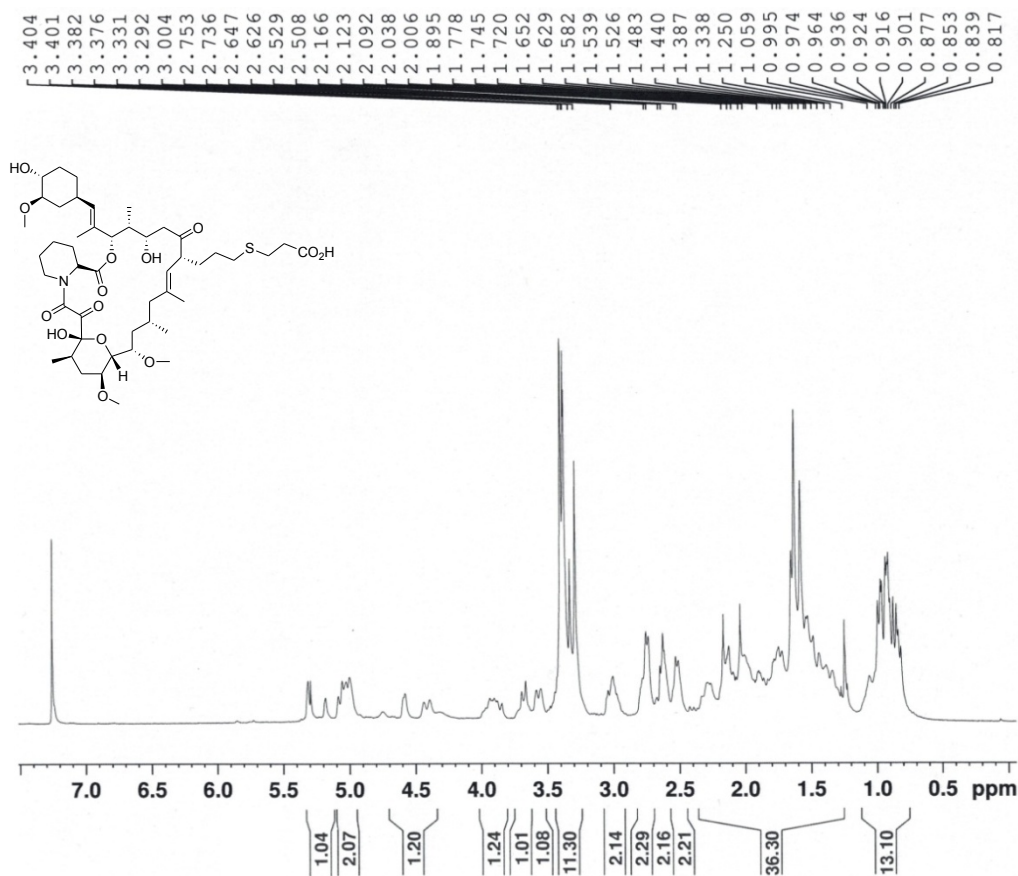

<sup>1</sup>H NMR of compound 11

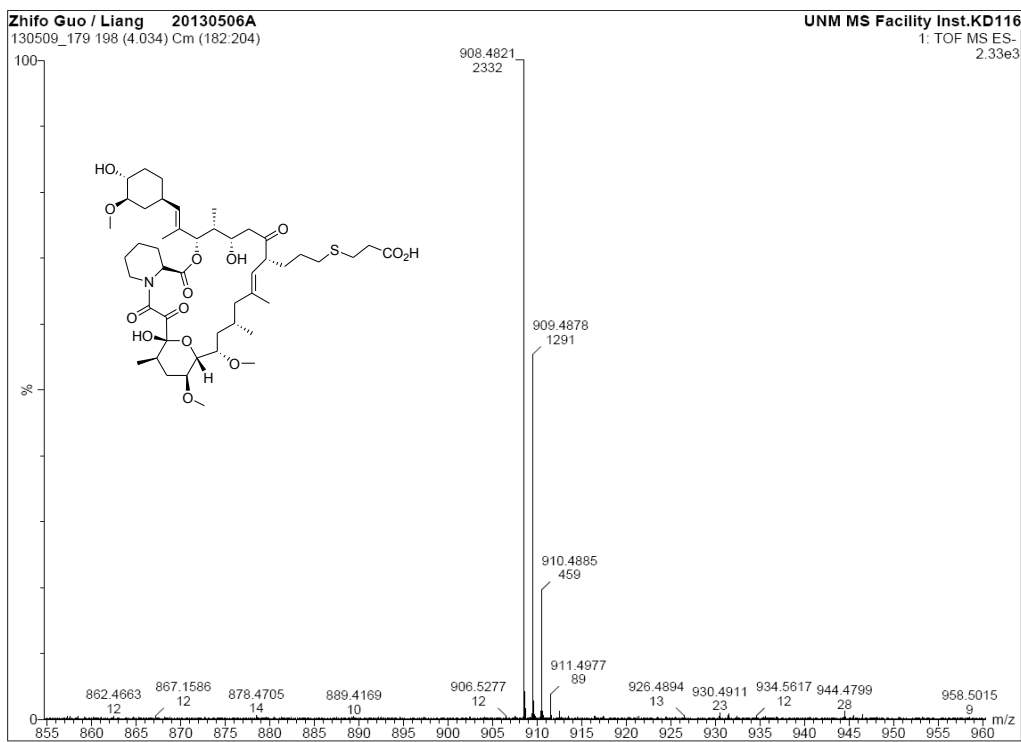

HRMS of compound 11

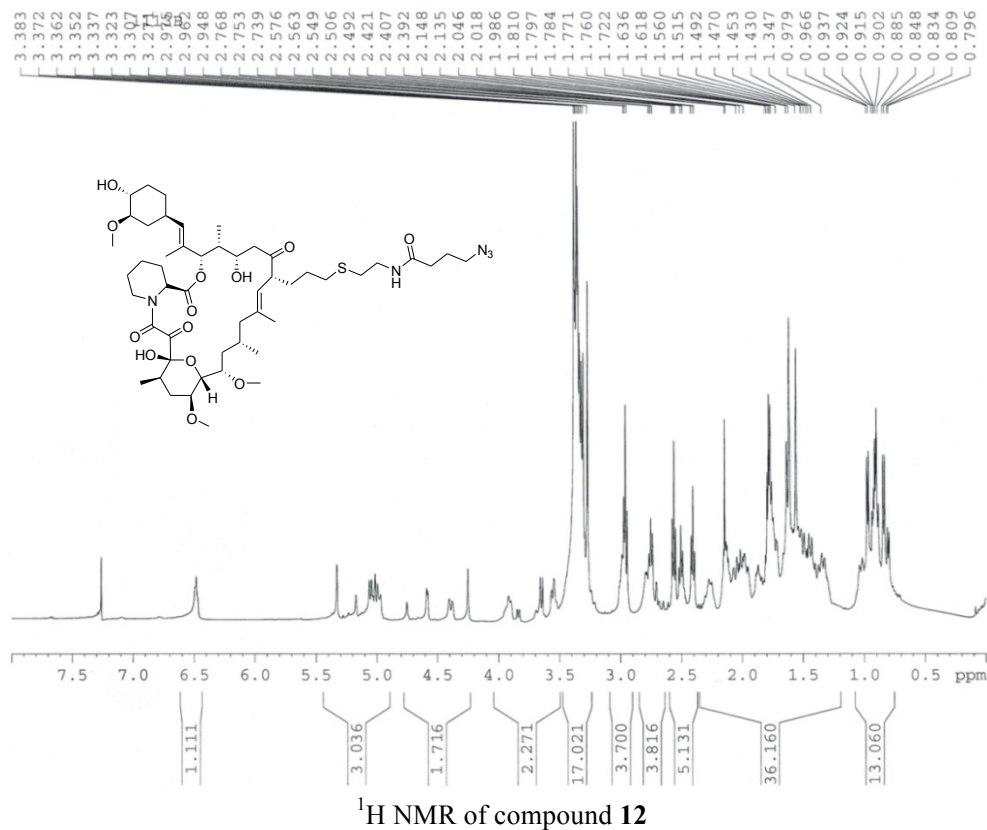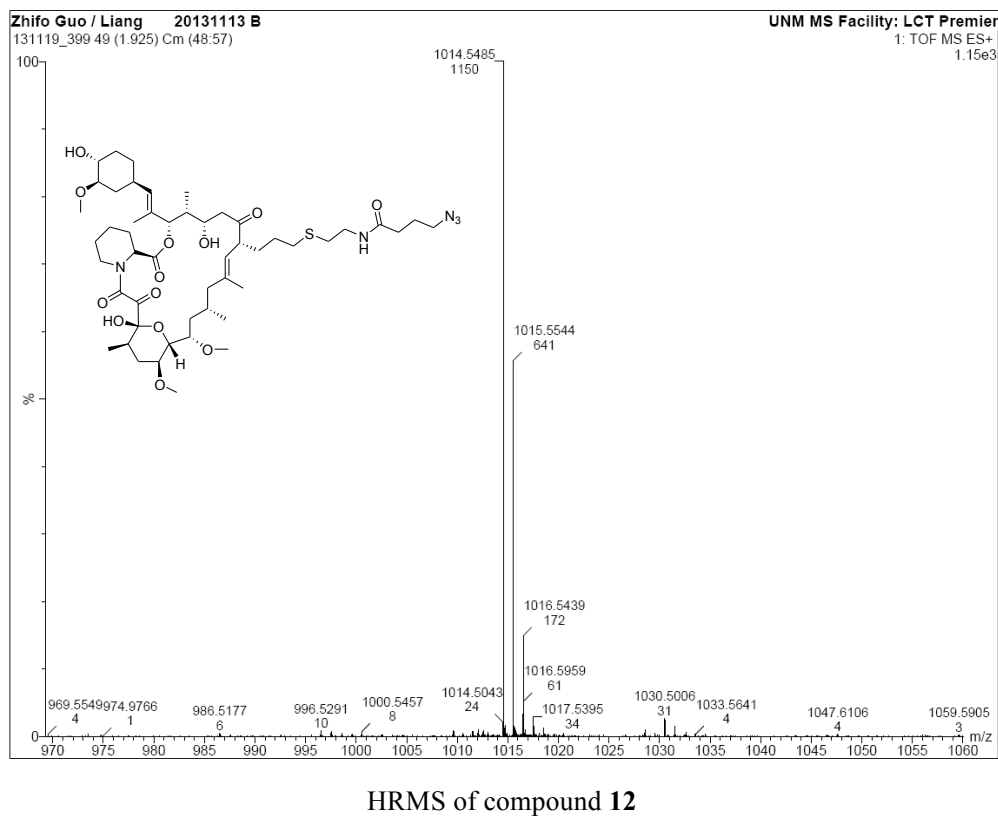

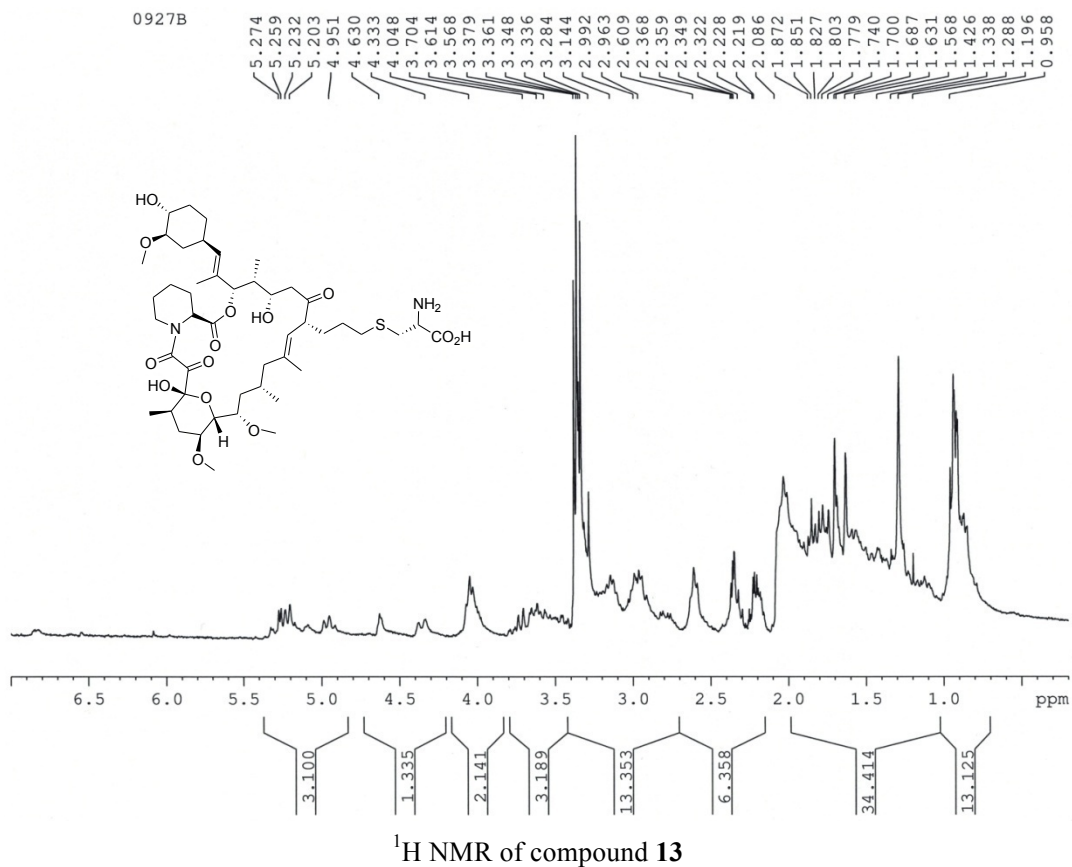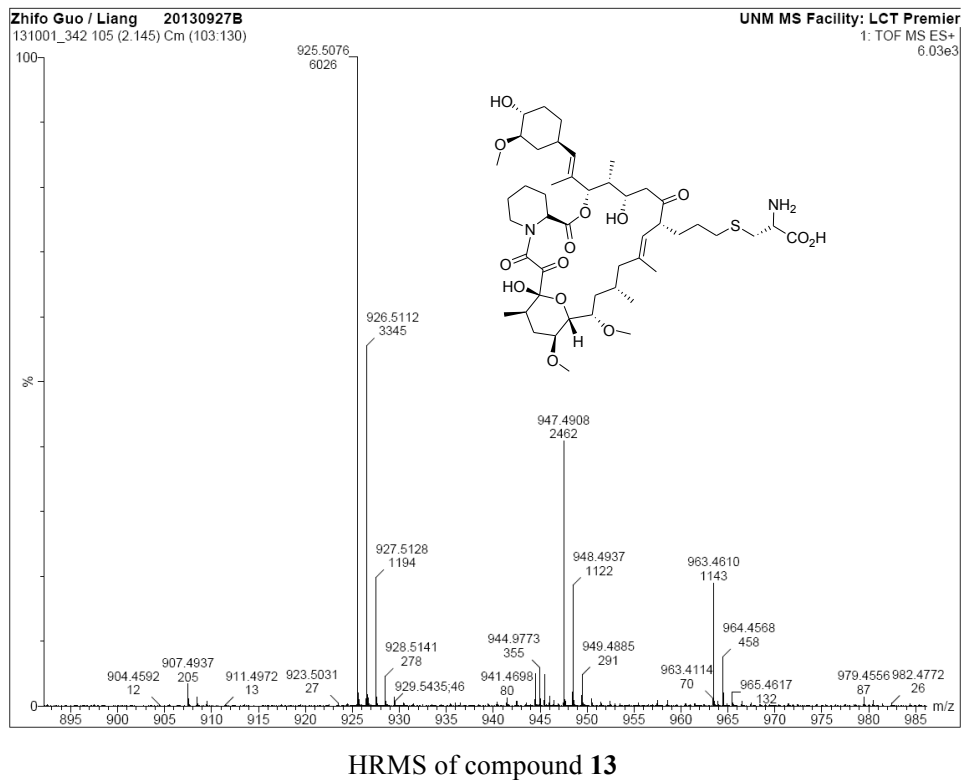

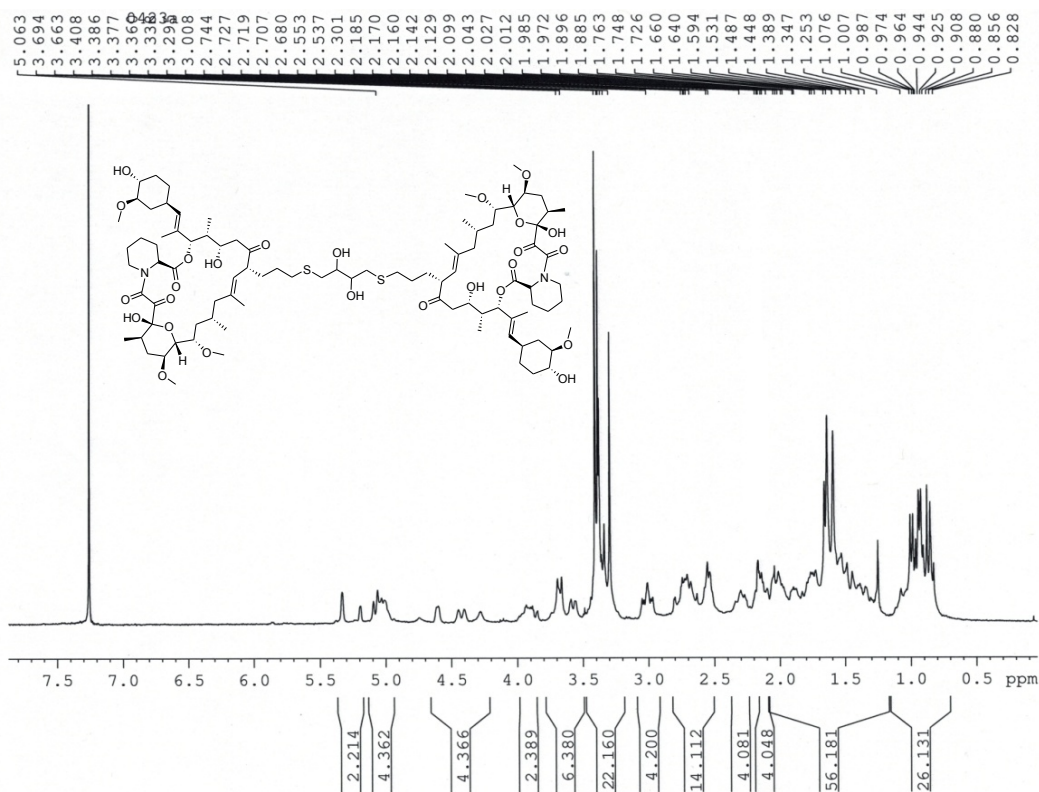

<sup>1</sup>H NMR of compound 15

Elemental Composition Report

Page 1

Single Mass Analysis

Tolerance = 20.0 PPM / DBE: min = -1.5, max = 50.0  
 Isotope cluster parameters: Separation = 1.0 Abundance = 1.0%

Monoisotopic Mass, Odd and Even Electron Ions  
 3 formula(e) evaluated with 3 results within limits (up to 50 closest results for each mass)

Zhifo Guo / Liang 20130423A  
 130424\_167b 364 (8.343) Cm (364.435)

UNM MS Facility Inst.KD116  
 1: TOF MS ES+  
 1.14e4

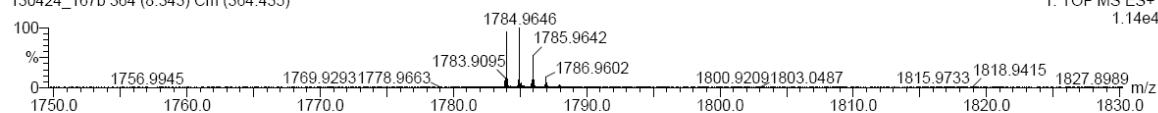

| Mass      | Calc. Mass | mDa  | PPM  | DBE  | Score | Formula                 |
|-----------|------------|------|------|------|-------|-------------------------|
| 1783.9602 | 1783.9659  | -5.7 | -3.2 | 19.5 | 2     | C92 H148 N2 O26 Na 32S2 |
|           | 1783.9320  | 28.2 | 15.8 | 23.5 | 3     | C93 H143 N2 O27 32S2    |
|           | 1783.9296  | 30.6 | 17.2 | 20.5 | 1     | C91 H144 N2 O27 Na 32S2 |

HRMS of compound 15
